# Supplementary material for: Chemoresistance acquisition induces a global shift of expression of aniogenesis-associated genes and increased pro-angogenic activity in neuroblastoma cells
Source: Mol Cancer. 2009 Sep 29;8:80. doi: 10.1186/1476-4598-8-80 (PMC2761864; doi:10.1186/1476-4598-8-80)
Supplement: Additional file 2 — Expression analysis of angiogenesis-associated genes. Angiogenesis-related genes that are differentially expressed between the parental chemosensitive UKF-NB-3 neuroblastoma cell line and the vincristine-resistant sub-line UKF-NB-3rVCR10. [file 1476-4598-8-80-S2.PDF]

**Additional file 2.** Angiogenesis-related genes that are differentially expressed between the parental chemosensitive UKF-NB-3 neuroblastoma cell line and the vincristine-resistant sub-line UKF-NB-3<sup>r</sup>VCR<sup>10</sup> as indicated by PANTHER pathway analysis of gene microarray (AB1700) expression data.

| <b>Comparison UKF-NB-3<sup>r</sup>VCR<sup>10</sup> versus UKF-NB-3</b> |                                                                         |                                                                                                                                                |
|------------------------------------------------------------------------|-------------------------------------------------------------------------|------------------------------------------------------------------------------------------------------------------------------------------------|
| Gene ID                                                                | Encoded protein                                                         | Fold change<br>UKF-NB-3 <sup>r</sup> VCR <sup>10</sup> / UKF-NB-3<br>(multiple-testing corrected p-value based on three biological replicates) |
| ARHGAP8                                                                | Rho GTPase activating protein 8                                         | 6.16 (0.009)                                                                                                                                   |
| JAK1                                                                   | Janus kinase 1                                                          | 5.27 (0.020)                                                                                                                                   |
| NOTCH1                                                                 | Notch1                                                                  | 4.14 (0.030)                                                                                                                                   |
| FGFR2                                                                  | FGF receptor 2                                                          | 4.13 (0.019)                                                                                                                                   |
| NRAS                                                                   | neuroblastoma RAS viral (v-ras) oncogene homolog                        | 3.77 (0.021)                                                                                                                                   |
| WNT10B                                                                 | wingless-type MMTV integration site family, member 10B; WNT-10B protein | 3.67 (0.035)                                                                                                                                   |
| DVL1                                                                   | dishevelled-1                                                           | 2.91 (0.007)                                                                                                                                   |
| RRAS                                                                   | R-Ras                                                                   | 2.72 (0.036)                                                                                                                                   |
| CASP9                                                                  | caspase 9                                                               | 2.42 (0.026)                                                                                                                                   |
| BIRC5                                                                  | survivin                                                                | 2.27 (0.008)<br>1.89 (0.010)                                                                                                                   |
| PDGFRB                                                                 | platelet-derived growth factor receptor beta; PDGFR $\beta$             | 2.20 (0.017)                                                                                                                                   |
| RHOC                                                                   | RhoC                                                                    | 2.13 (0.047)                                                                                                                                   |
| STAT3                                                                  | Signal transducer and activator of transcription 3                      | 2.11 (0.028)<br>1.61 (0.043)                                                                                                                   |

|        |                                                                                                                 |              |
|--------|-----------------------------------------------------------------------------------------------------------------|--------------|
| SHC1   | SHC (Src homology 2 domain containing) transforming protein 1                                                   | 2.07 (0.016) |
| MAPK12 | ERK3<br>ERK5<br>ERK6<br>p38 $\gamma$<br>SAPK3                                                                   | 2.04 (0.014) |
| FGFR3  | Fibroblast growth factor receptor 3<br>CD133                                                                    | 1.97 (0.021) |
| MAPK3  | Mitogen-activated protein kinase 3;<br>MAPK1;<br>Extracellular signal-regulated kinase 1 (ERK1);<br>p44         | 1.75 (0.047) |
| PIK4CB | phosphatidylinositol 4-kinase $\beta$ ;<br>phosphatidylinositol 4-kinase, catalytic, $\beta$ ;<br>PI4K- $\beta$ | 1.65 (0.044) |
| MAPK14 | mitogen-activated protein kinase 14;<br>p38 $\alpha$                                                            | 1.63 (0.024) |
| AXIN1  | axin 1;<br>axis inhibitor 1;<br>axis inhibitor protein 1                                                        | 1.52 (0.026) |
| ABR    | Active breakpoint cluster region-related protein;<br>active BCR-related gene;<br>MDB                            | 1.52 (0.015) |
| STAT1  | signal transducer and activator of transcription 1;<br>STAT91;<br>ISGF-3                                        | 1.51 (0.021) |
| HIF1A  | Hypoxia-inducible factor 1 alpha;<br>ARNT interacting protein                                                   | 1.47 (0.016) |
| PXN    | paxillin                                                                                                        | 1.45 (0.022) |
| GRB2   | growth factor receptor-bound protein 2;<br>EGFRBP-GRB2; growth factor receptor-bound protein 3                  | 1.43 (0.011) |

|         |                                                                                                                                                              |                              |
|---------|--------------------------------------------------------------------------------------------------------------------------------------------------------------|------------------------------|
| BCR     | breakpoint cluster region                                                                                                                                    | 1.36 (0.019)                 |
| RHOA    | ras homolog gene family, member A;<br>small GTP binding protein RhoA;<br>RhoA<br>Rho12                                                                       | 1.25 (0.030)                 |
| null    | unknown gene                                                                                                                                                 | 0.69 (0.014)                 |
| FZD3    | frizzled 3;<br>frizzled homolog 3 (Drosophila)                                                                                                               | 0.68 (0.013)                 |
| CTNNB1  | $\beta$ -catenin;<br>catenin $\beta$ -1;<br>catenin (cadherin-associated protein),<br>beta 1 (88kD)                                                          | 0.55 (0.021)                 |
| PDGFA   | platelet-derived growth factor $\alpha$ ;<br>PDGF A-chain;<br>PDGF1                                                                                          | 0.53 (0.019)                 |
| WNT5B   | wingless-type MMTV integration site<br>family, member 5B;<br>WNT-5B protein                                                                                  | 0.32 (0.029)                 |
| YES1    | v-yes-1 Yamaguchi sarcoma viral<br>oncogene homolog 1;<br>c-Yes;<br>Yamaguchi sarcoma oncogene;<br>Proto-oncogene tyrosine-protein<br>kinase Yes             | 0.31 (0.007)<br>0.28 (0.009) |
| PLA2G4E | Phospholipase A2 group IVE;<br>Cytosolic phospholipase A2 epsilon;<br>cPLA2 $\epsilon$                                                                       | 0.29 (0.026)                 |
| FZD2    | frizzled 2                                                                                                                                                   | 0.26 (0.014)                 |
| FRZB    | Frizzled- related protein 1;<br>FRZB1;<br>Frezzed;<br>frizzled-related protein;<br>FRP;<br>FRP-3;<br>Fritz;<br>Secreted frizzled related protein 1;<br>SFRP1 | 0.24 (0.010)                 |
