# Supplementary material for: Chemoresistance acquisition induces a global shift of expression of aniogenesis-associated genes and increased pro-angogenic activity in neuroblastoma cells
Source: Mol Cancer. 2009 Sep 29;8:80. doi: 10.1186/1476-4598-8-80 (PMC2761864; doi:10.1186/1476-4598-8-80)
Supplement: Additional file 7 — Endothelial cell tube formation induced by supernatants of neuroblastoma cells. Quantification of endothelial cell tube formation induced by supernatants of neuroblastoma cells. [file 1476-4598-8-80-S7.PDF]

## Additional file 7

A

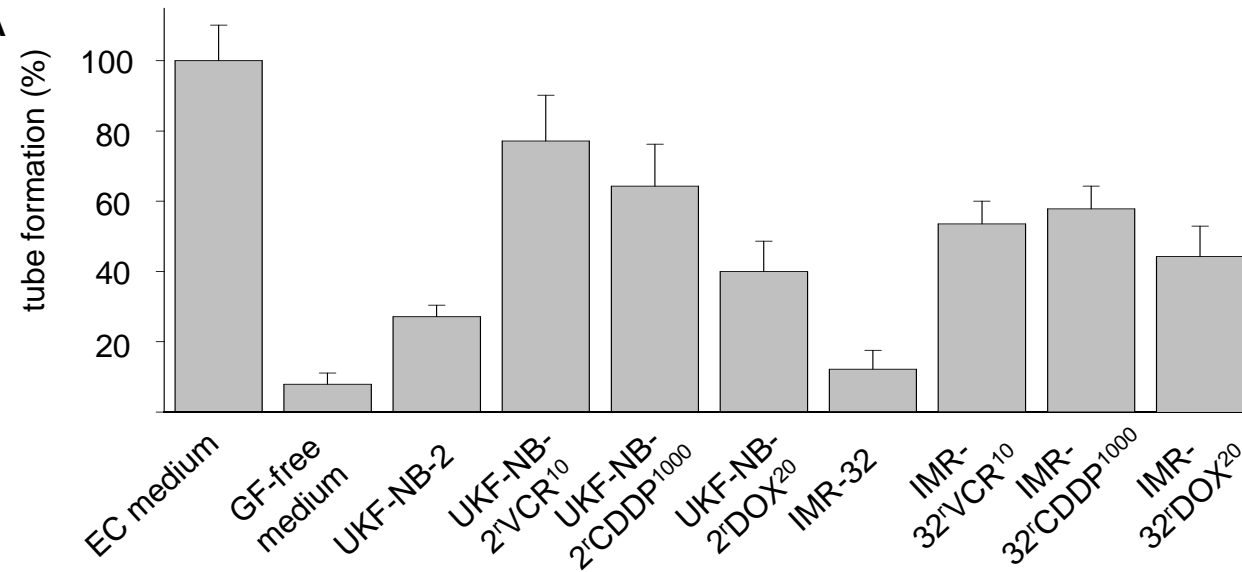

B

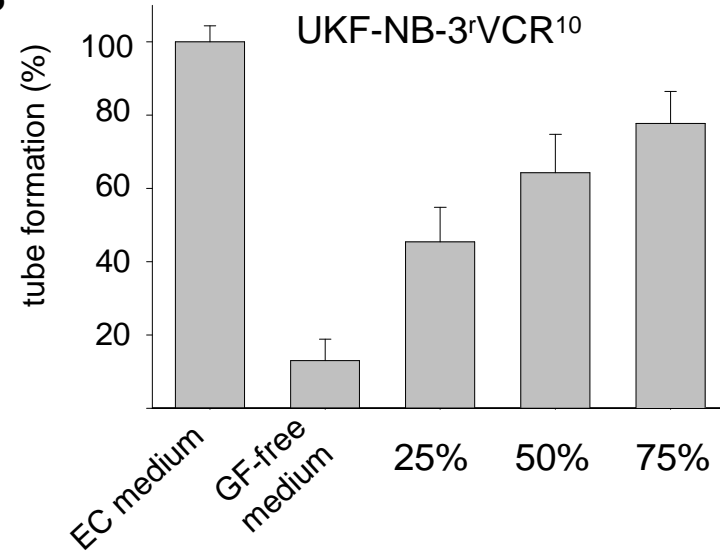

C

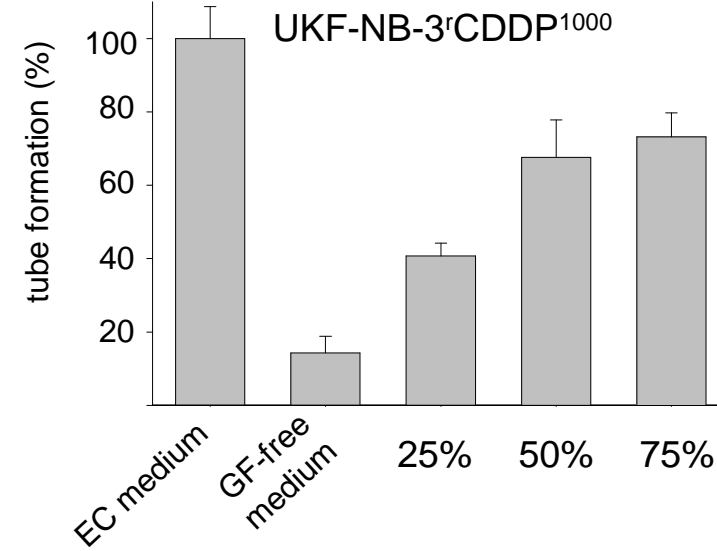

**Additional file 7.** A) Quantification of tube formation by counting of branching points of HUVEC incubated with 1:1 mixtures of IMDM and supernatants of chemosensitive neuroblastoma cell lines (UKF-NB-2, IMR-32) and the corresponding chemoresistant sub-lines (UKF-NB-2<sup>r</sup>VCR<sup>10</sup>, UKF-NB-2<sup>r</sup>CDDP<sup>1000</sup>, UKF-NB-2<sup>r</sup>DOX<sup>20</sup>, IMR-32<sup>r</sup>VCR<sup>10</sup>, IMR-32<sup>r</sup>CDDP<sup>1000</sup>, IMR-32<sup>r</sup>DOX<sup>10</sup>) + 10% FCS 16h after seeding on extracellular matrix in comparison to endothelial cell medium (EC medium, IMDM + 15% FCS + 5% pooled human serum + bFGF 2.5 ng/ml) and growth factor-free medium (GF-free medium, IMDM + 10% FCS).  $P < 0.05$  relative to endothelial cells incubated with the supernatants of the corresponding parental cells B) Influence of different ratios of IMDM and supernatants of UKF-NB-3<sup>r</sup>VCR<sup>10</sup> cells (25%, 50%, or 75% UKF-NB-3<sup>r</sup>VCR<sup>10</sup> supernatant) + 10% FCS on tube formation 16h after seeding on extracellular matrix in comparison to EC medium or GF-free medium. C) Influence of different ratios of IMDM + 10% FCS and supernatants of UKF-NB-3<sup>r</sup>CDDP<sup>1000</sup> cells (25%, 50%, or 75% UKF-NB-3<sup>r</sup>CDDP<sup>1000</sup> supernatant) on tube formation 16h after seeding on extracellular matrix in comparison to EC medium or GF-free medium.
