# Supplementary material for: Chemoresistance acquisition induces a global shift of expression of aniogenesis-associated genes and increased pro-angogenic activity in neuroblastoma cells
Source: Mol Cancer. 2009 Sep 29;8:80. doi: 10.1186/1476-4598-8-80 (PMC2761864; doi:10.1186/1476-4598-8-80)
Supplement: Additional file 10 — Expression of stemness genes. Comparison of expression of selected stemness genes in chemoresistant or chemosensitive neuroblastoma cells. [file 1476-4598-8-80-S10.PDF]

**Additional file 10.** Expression of selected stemness genes (detected by gene microarray analysis).

| Gene ID | Encoded protein | relative expression UKF-NB-3 <sup>1</sup> VCR <sup>10</sup> versus UKF-NB-3 (multiple-testing corrected p-value based on three biological replicates) | relative expression UKF-NB-3 <sup>1</sup> CDDP <sup>1000</sup> versus UKF-NB-3 (multiple-testing corrected p-value based on three biological replicates) |
|---------|-----------------|-------------------------------------------------------------------------------------------------------------------------------------------------------|----------------------------------------------------------------------------------------------------------------------------------------------------------|
| NANOG   | Nanog           | no signal <sup>1</sup><br>0.364 (0.094)                                                                                                               | 0.528 (0.499)<br>0.652 (0.655)                                                                                                                           |
| POU5F1  | Oct4            | no signal<br>0.403 (0.156)<br>no signal                                                                                                               | 0.489 (0.263)<br>0.223 (0.049)<br>0.724 (0.186)                                                                                                          |
| PCGF4   | Bmi-1           | 1.224 (0.606)<br>0.670 (0.038)                                                                                                                        | 0.647 (0.490)<br>0.491 (0.300)                                                                                                                           |

<sup>1</sup> no expression detected
