# Supplementary material for: Chemoresistance acquisition induces a global shift of expression of aniogenesis-associated genes and increased pro-angogenic activity in neuroblastoma cells
Source: Mol Cancer. 2009 Sep 29;8:80. doi: 10.1186/1476-4598-8-80 (PMC2761864; doi:10.1186/1476-4598-8-80)
Supplement: Additional file 14 — Bioinformatic pathway analysis in neuroblastoma patients' tumours. Signalling pathways most strongly differentially regulated between non-N-myc amplified neuroblastoma tissues from patients with favourable outcome or poor outcome. [file 1476-4598-8-80-S14.PDF]

**Additional file 14.** The top four PANTHER signalling pathways (taken from [www.pantherdb.org](http://www.pantherdb.org)) most strongly differentially regulated between non-N-myc amplified neuroblastoma tissues from patients with favourable outcome (no relapse) or poor outcome (relapse of disease). Neuroblastoma gene expression data was obtained from Gene Expression Omnibus ([www.ncbi.nlm.nih.gov/geo/](http://www.ncbi.nlm.nih.gov/geo/); accession number GSE3446; Asgharzadeh et al., J Natl Cancer Inst 2006;98:1193-203).

| <b>PANTHER signalling pathway</b> | <b>p-value</b>                           |
|-----------------------------------|------------------------------------------|
| 1. Wnt signalling pathway         | $2.80 \times 10^{-16}$                   |
| 2. Huntington disease             | $6.53 \times 10^{-11}$                   |
| <b>3. Angiogenesis</b>            | <b><math>7.68 \times 10^{-11}</math></b> |
| 4. PDGF signalling pathway        | $3.55 \times 10^{-9}$                    |
